# Supplementary figures and images for: JAZF1, A Novel p400/TIP60/NuA4 Complex Member, Regulates H2A.Z Acetylation at Regulatory Regions
Source: MDPI journal article supplement (doi:10.3390/ijms22020678), 2021-01-12

Supplementary Figure 2

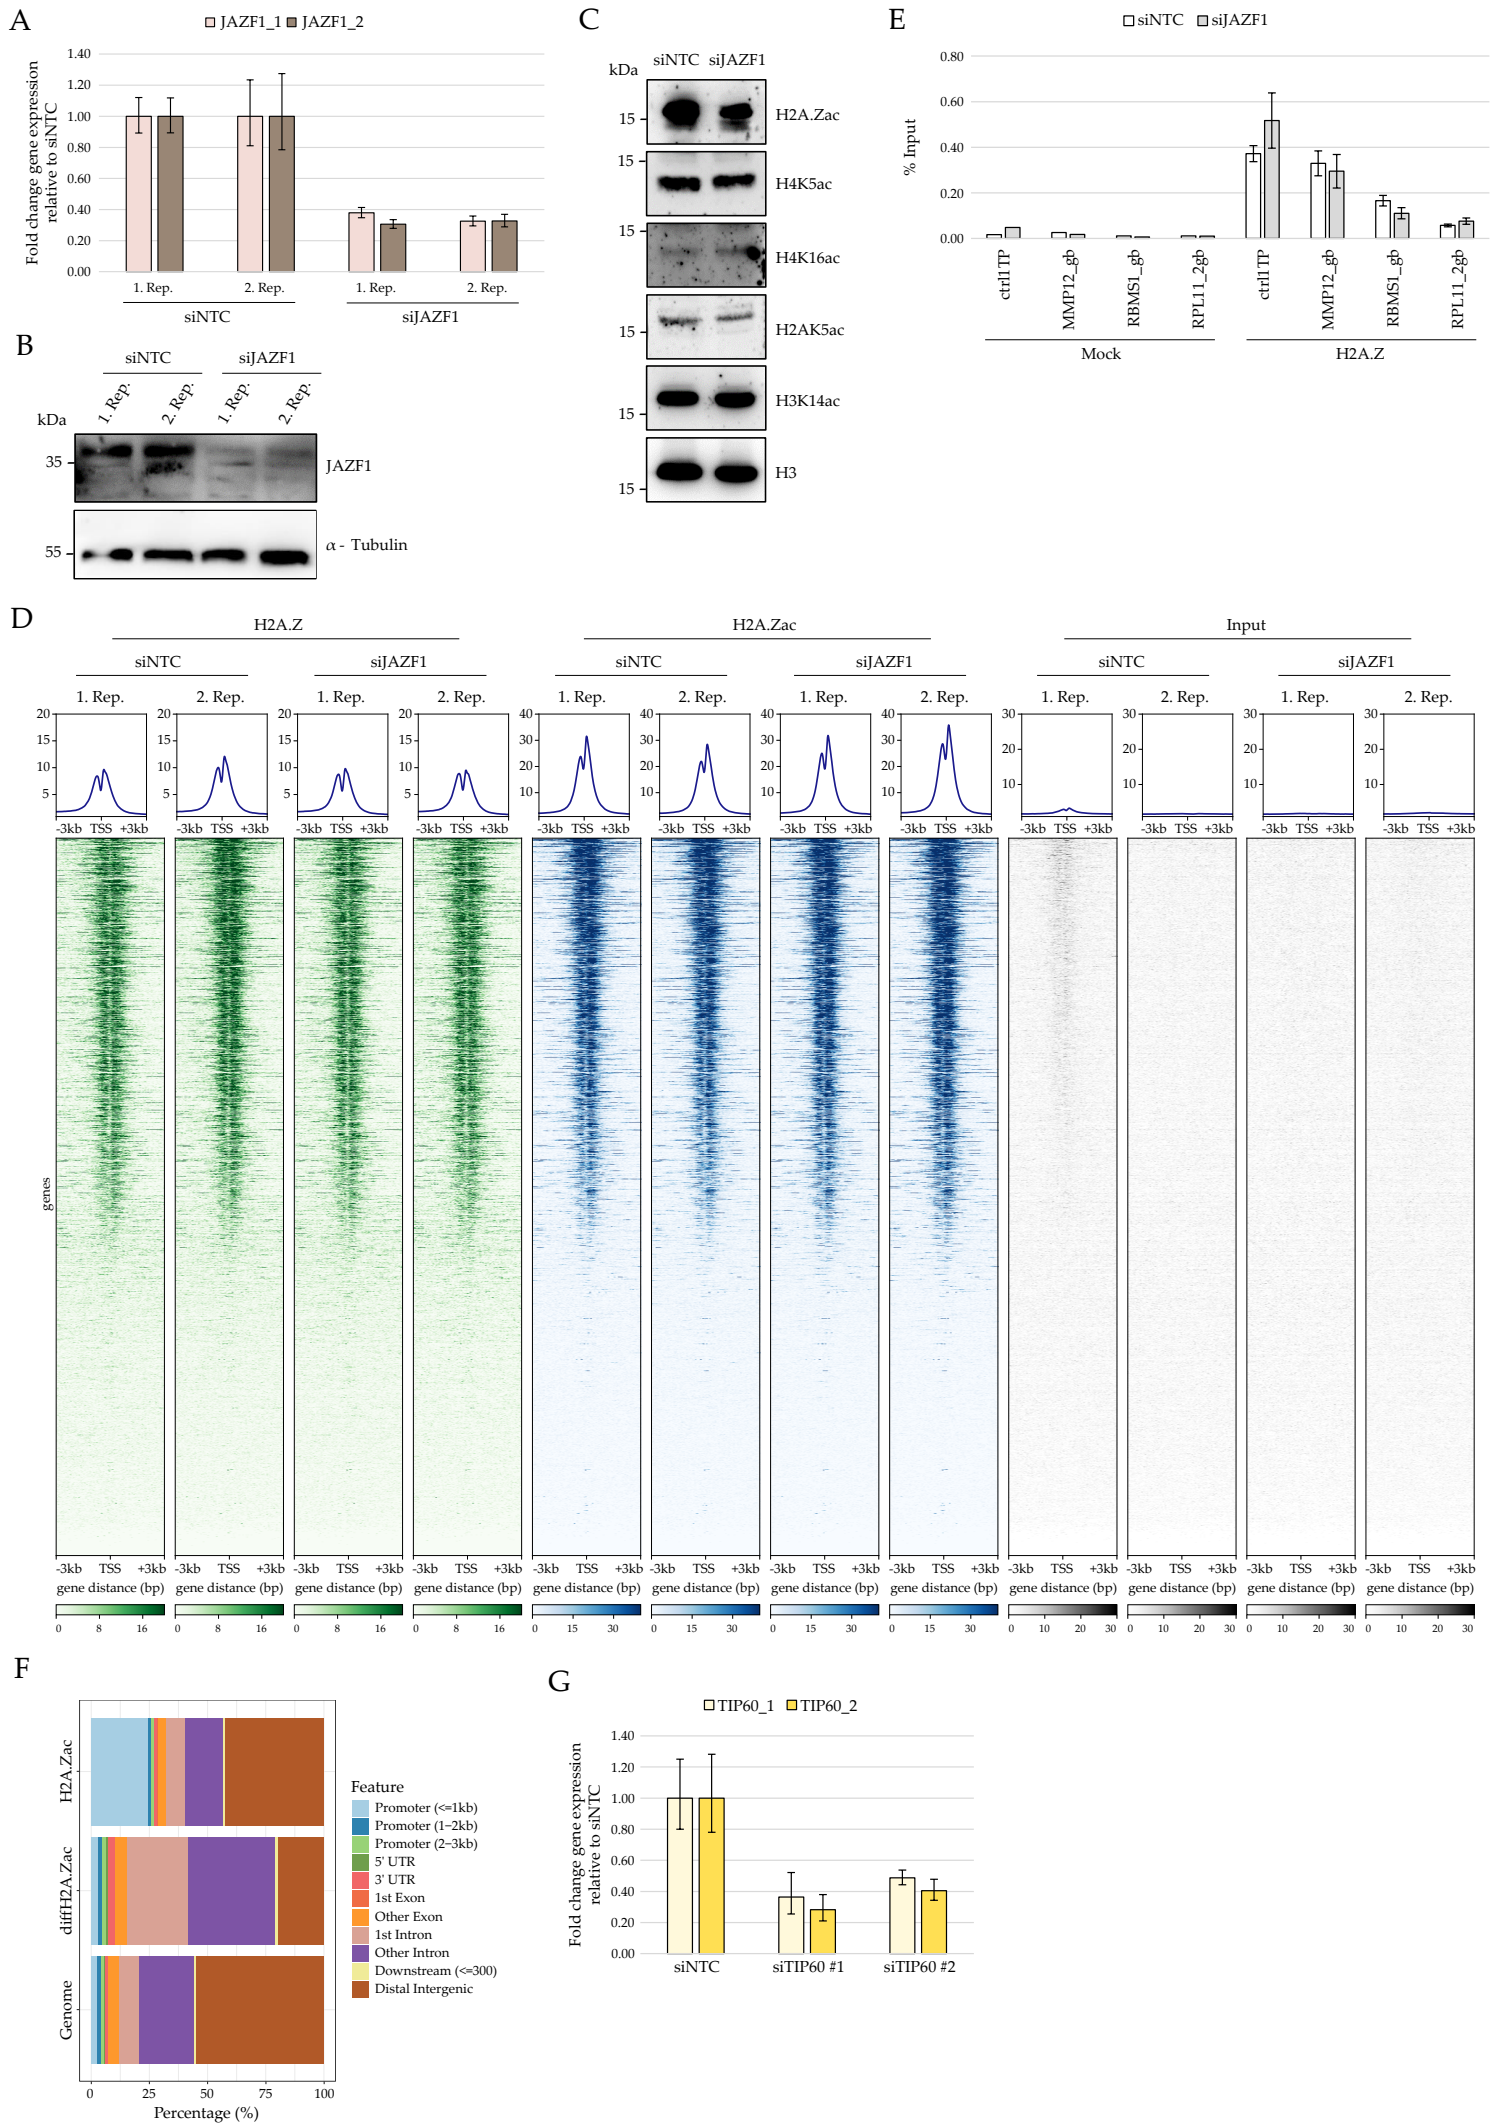

Supplement: s1 [file s1]

Supplementary Figure 1

A

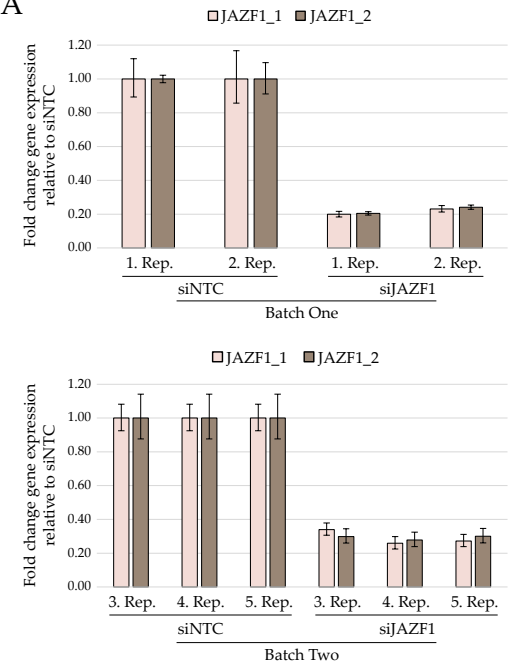

B

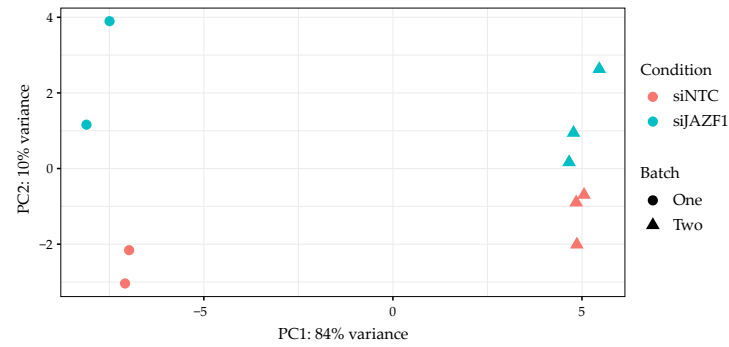

C

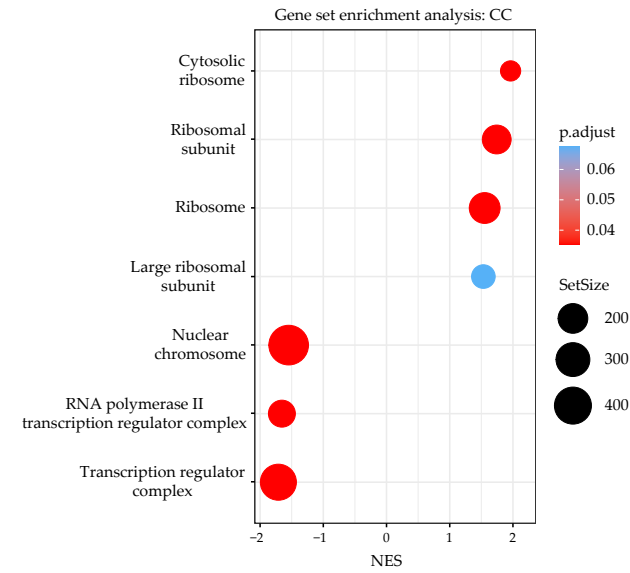

D

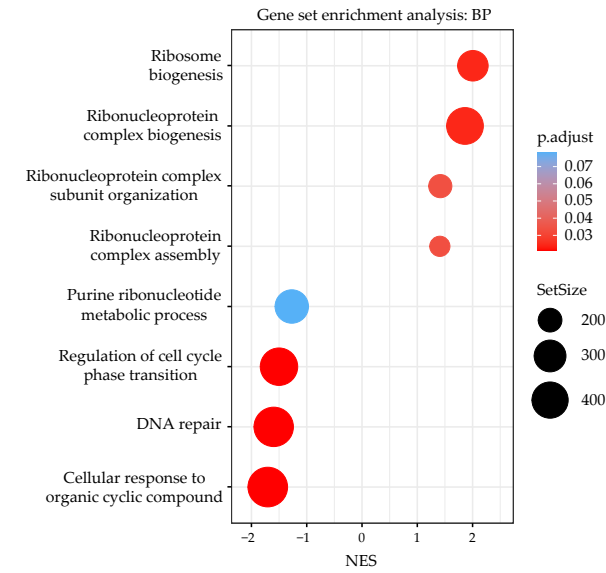

Supplement: s1 [file s1]
